# Supplementary material for: Rosiglitazone drives cavin-2/SDPR expression in adipocytes in a CEBPα-dependent manner
Source: PubMed Central journal article supplement (PMC5344386; doi:10.1371/journal.pone.0173412), 2017-03-09

# S1 Fig

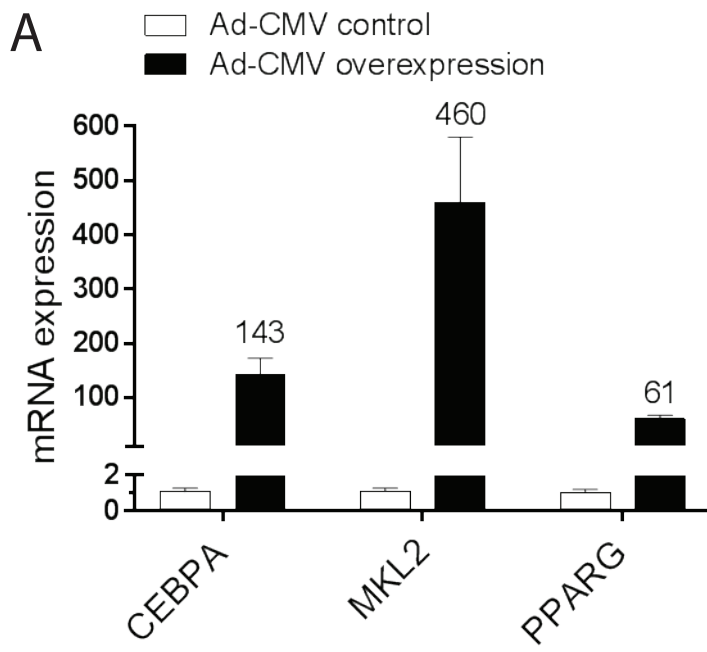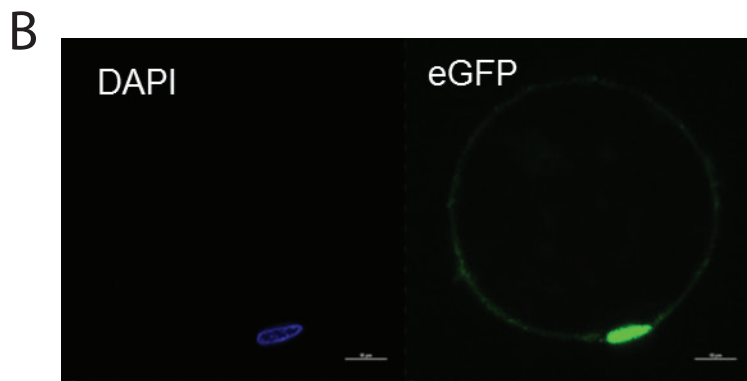

Supplement: pone.0173412.s001.pdf [file pone.0173412.s001.pdf]
